# Supplementary material for: A Pseudomonas aeruginosa-Derived Particulate Vaccine Protects against P. aeruginosa Infection
Source: MDPI journal article supplement (doi:10.3390/vaccines9070803), 2021-07-20
Supplement: s1 [file s1]

**Table S1. Bacterial strains, plasmids and primers used in this study.**

| Strains, Plasmids and Primers                                            |                                                                                                                                                       | Relevant characteristics | References |
|--------------------------------------------------------------------------|-------------------------------------------------------------------------------------------------------------------------------------------------------|--------------------------|------------|
| <b>1. Bacterial strains</b>                                              |                                                                                                                                                       |                          |            |
| <i>E. coli</i>                                                           |                                                                                                                                                       |                          |            |
| XL1-Blue                                                                 | <i>recA1 endA1 gyrA96 thi-1 hsdR17 supE44 relA1 lac</i> [F' <i>proAB lacI<sup>q</sup> lacZ</i> $\Delta$ M15 Tn10 (Tet <sup>r</sup> )]                 |                          | Stratagene |
| <i>P. aeruginosa</i>                                                     |                                                                                                                                                       |                          |            |
| <i>P. aeruginosa</i> PAO1                                                | Prototroph, non-mucoid                                                                                                                                |                          | ATCC 15692 |
| <i>P. aeruginosa</i> N13                                                 | Early CF clinical isolate, serotype O6, non-mucoid                                                                                                    |                          | [1]        |
| PAO1 $\Delta$ phaC1ZC2 $\Delta$ alg8 $\Delta$ pelF                       | PAO1 $\Delta$ phaC1ZC2 $\Delta$ alg8 derivative with markerless, isogenic <i>pelF</i> deletion, triple mutant                                         |                          | [2]        |
| PAO1 $\Delta$ phaC1ZC2 $\Delta$ alg8 $\Delta$ pelF $\Delta$ p <i>slA</i> | PAO1 $\Delta$ phaC1ZC2 $\Delta$ alg8 $\Delta$ pelF derivative with markerless, isogenic <i>pslA</i> deletion, quadruple mutant                        |                          | This study |
| <b>2. Plasmids</b>                                                       |                                                                                                                                                       |                          |            |
| pUC57                                                                    | Cloning vector, ColE1 origin, Amp <sup>r</sup>                                                                                                        |                          | Fermentas  |
| pHERD20T                                                                 | Amp <sup>r</sup> Cb <sup>r</sup> , pUCP20T P <sub>lac</sub> replaced with fragment of <i>araC</i> -PBAD cassette                                      |                          | [3]        |
| pHERD20T-2                                                               | pHERD20T derivative were a 13 bp fragment of 5' end of LacZ $\alpha$ is removed                                                                       |                          | [2]        |
| pHERD20T-2_PhaC1                                                         | <i>P. aeruginosa</i> codon optimized PhaC1 fragment inserted into <i>XbaI/HindIII</i> site of pHERD20T-2                                              |                          | [2]        |
| pHERD20T-2_Ag-PhaC1                                                      | <i>P. aeruginosa</i> codon optimized Ag fragment inserted into <i>XbaI/NdeI</i> sites of pHERD20T-2_PhaC1                                             |                          | [2]        |
| pHERD20T-2_PhaC1-Ag                                                      | <i>P. aeruginosa</i> codon optimized Ag fragment inserted into <i>XbaI/HindIII</i> sites of pHERD20T-2_PhaC1                                          |                          | [2]        |
| pUC57_XPopBS                                                             | pUC57 derivative containing <i>P. aeruginosa</i> codon optimized PopB fragment flanked by <i>XbaI/SalI</i> sites                                      |                          | This study |
| pHERD20T-2_PopB-Ag-PhaC1                                                 | <i>P. aeruginosa</i> codon optimized PopB fragment from pUC57_XPopBS inserted into <i>SalI/XbaI</i> sites of pHERD20T-2_Ag-PhaC1                      |                          | This study |
| pHERD20T-2_PopB-PhaC1                                                    | <i>P. aeruginosa</i> codon optimized PopB fragment from pHERD20T-2_PopB-Ag-PhaC1, replacing Ag into <i>XbaI/NdeI</i> sites of pHERD20T-2_Ag-PhaC1     |                          | This study |
| pHERD20T-2_Ag-PhaC1-Ag                                                   | <i>P. aeruginosa</i> codon optimized Ag fragment inserted into <i>XbaI/HindIII</i> sites of pHERD20T-2_Ag-PhaC1                                       |                          | This study |
| pHERD20T-2_PhaC1-PopB                                                    | <i>P. aeruginosa</i> codon optimized PopB fragment from pUC57_XPopBS, replacing Ag into <i>XhoI/EcoRI</i> sites of pHERD20T-2_PhaC1-Ag                |                          | This study |
| pHERD20T-2_Ag-PhaC1-PopB                                                 | <i>P. aeruginosa</i> codon optimized PopB fragment from pUC57_XPopBS, replacing Ag into <i>XhoI/EcoRI</i> sites of pHERD20T-2_AgPhaC1-Ag              |                          | This study |
| pHERD20T-2_PhaC1-PopB-Ag                                                 | <i>P. aeruginosa</i> codon optimized PopB-Ag fragment from pHERD20T-2_PopB-Ag-PhaC1, replacing Ag into <i>XhoI/EcoRI</i> sites of pHERD20T-2_PhaC1-Ag |                          | This study |
| <b>3. Primers</b>                                                        |                                                                                                                                                       | 5'-3'                    |            |
| <b>Primer name</b>                                                       |                                                                                                                                                       | <b>Sequence*</b>         |            |
| <i>XbaI</i> popB_fwd                                                     | ATCCTCTAGAAAGGAGATATACTTATGTTTGGTTGGATC                                                                                                               |                          | This study |
| <i>NdeI</i> popB_rev                                                     | ACTCATATGGCCACCGCCACTACCCGCTGCCGGTCGGCTG-GACAGGTTG                                                                                                    |                          | This study |
| Primer 5' ( <i>XhoI</i> )                                                | AAAAA CTCGAGTTTGGTTGGATCAGTGCAATAGCTTCGATC                                                                                                            |                          | This study |
| Primer 3' ( <i>EcoRI</i> )                                               | AAAAAAGAATTCTCAGATCGCTGCCGGTCGGCTGGACAGGTTG                                                                                                           |                          | This study |
| <i>XhoI</i> -2                                                           | ACAAACTCGAGTTTGGTTGGATCAGTGCAATAGCTTCG                                                                                                                |                          | This study |
| <i>EcoRI</i> -2                                                          | AAAAAAGAATTCTCACTTGC GGCTCGCCTTCTCC                                                                                                                   |                          | This study |

Amp<sup>r</sup>, ampicillin resistance; Gm<sup>r</sup>, gentamicin resistance; Tet<sup>r</sup>, tetracycline resistance; Cm<sup>r</sup> chloramphenicol resistance.

\*Restriction sites are underlined.

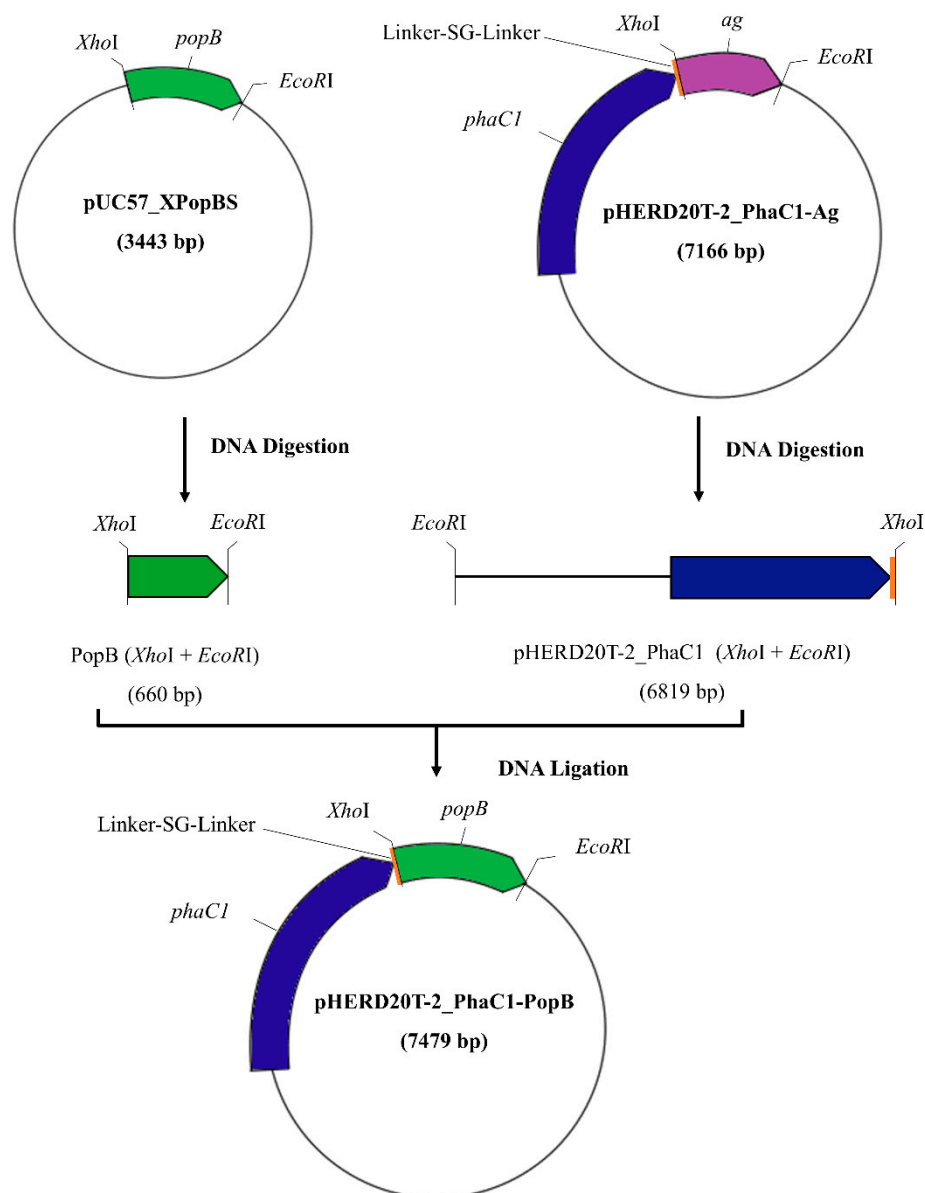

**Figure S1.** Strategy for the construction of pHERD20T-2\_PhaC1-PopB for PHA-PopB bead vaccine production. The *Pseudomonas* codon optimized PopB fragment was isolated from pUC57\_XPopBS by PCR amplification using primers Primer 5' (*XhoI*) and Primer 3' (*EcoRI*), followed by recovery of DNA fragments using agarose gel electrophoresis and gel purification. The recovered PopB fragment was digested using restriction enzymes *XhoI* and *EcoRI*, and subjected to purification. The PopB fragment was ligated using T4 DNA ligase into the linearized vector pHERD20T-2\_PhaC1 which was generated by restriction enzyme digest with *XhoI* and *EcoRI*, generating the final plasmid pHERD20T-2\_PhaC1-PopB.

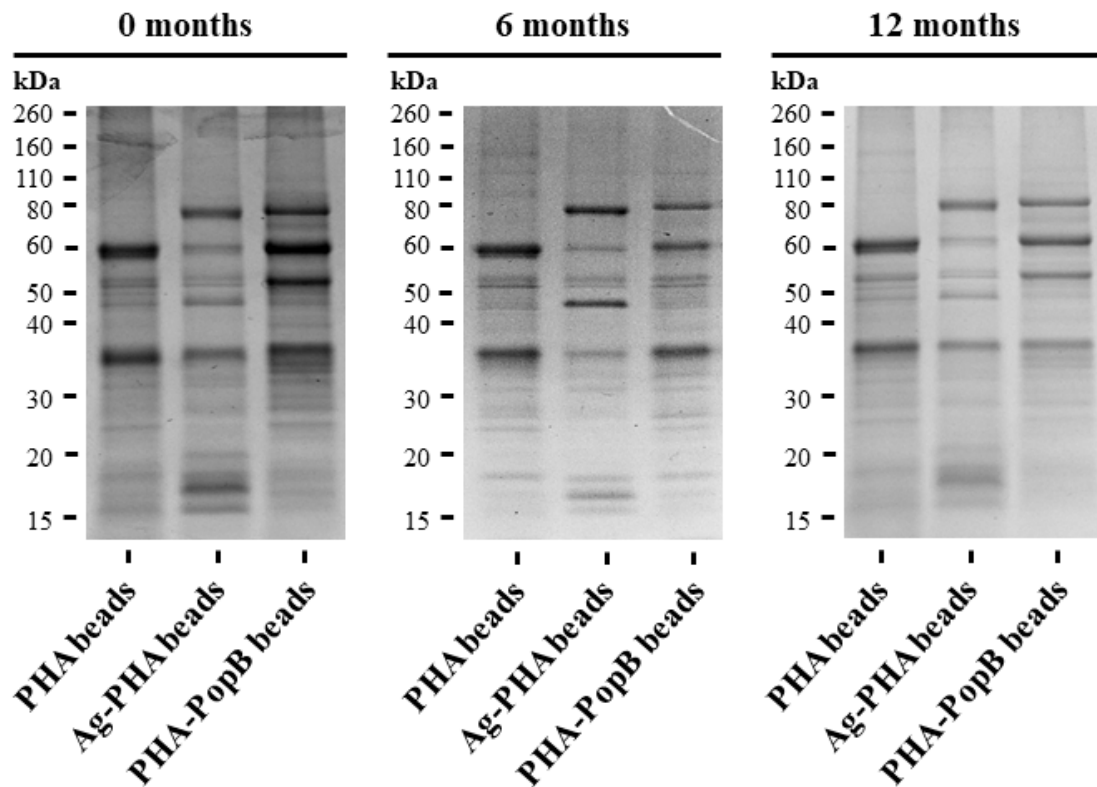

**Figure S2.** Stability study. Protein profiles of PHA bead formulation were assessed after storage for 0, 6 and 12 months at 4°C by SDS-PAGE. The gel was stained with Coomassie Blue. PHA (63.2 kDa), Ag-PHA (77.7 kDa), and PHA-PopB (86.4 kDa) fusion proteins along with the HCPs were isolated from *P. aeruginosa* PAO1ΔCΔ8ΔF strain containing the respective plasmids.

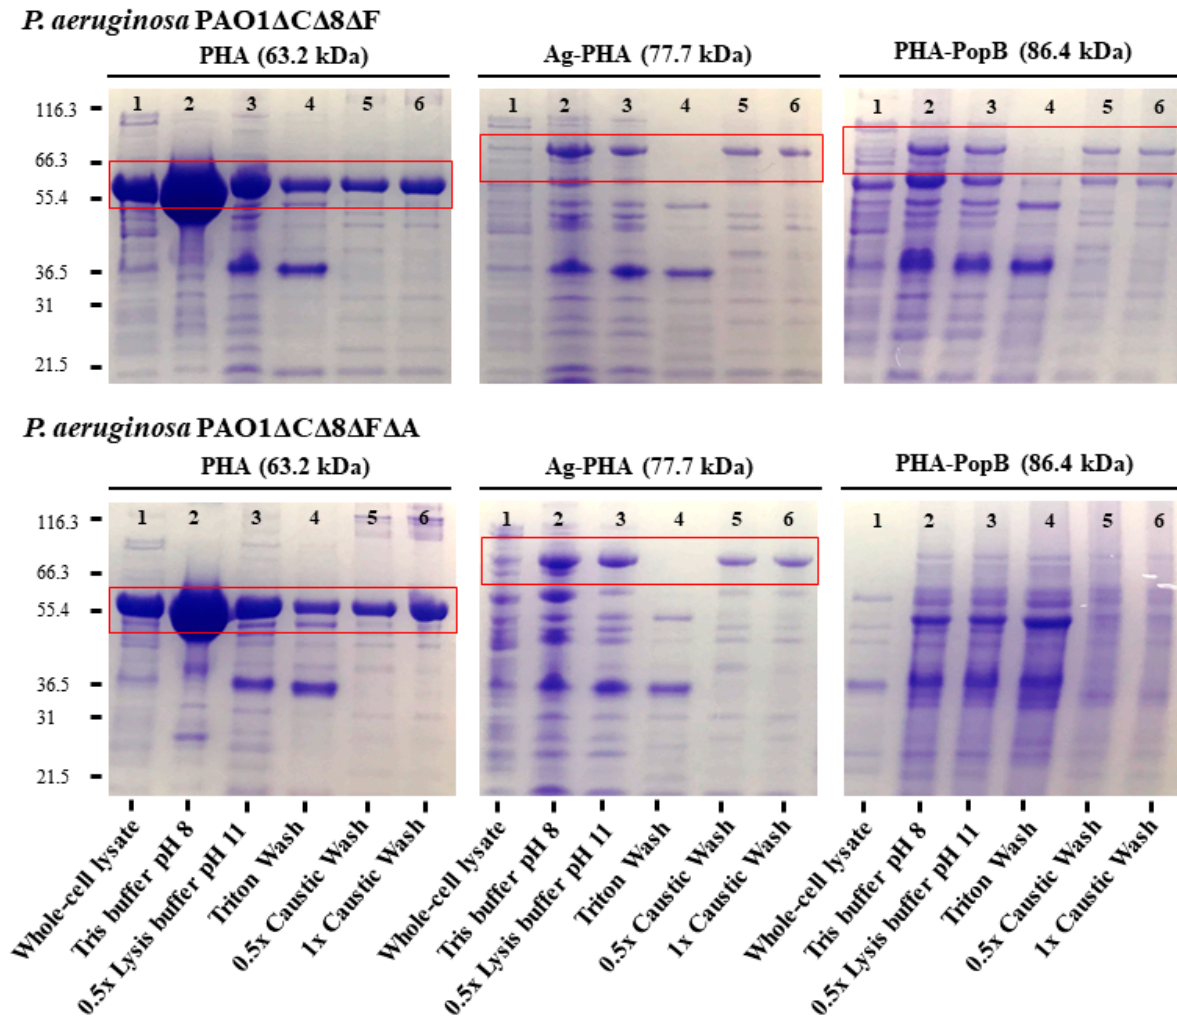

**Figure S3.** Target fusion protein production in *P. aeruginosa* PAO1ΔCΔ8ΔF and PAO1ΔCΔ8ΔFΔA production strains containing the respective plasmids for the production of PHA, Ag-PHA and PHA-PopB, respectively. Target fusion proteins are in red boxes. Lane 1, whole-cell lysate; lanes 2-6, different washing buffers that were tested for purification.

**Table S2.** Sequences of OprF, OprI and AlgE.

| Antigens | Sequences                                                     |
|----------|---------------------------------------------------------------|
| OprF     | NATAEGRAINRRVE                                                |
| OprI     | SSHSKETEARLTATEDAAARAQARADEAYRKADALGAAQKAQQTADANERALRMLEKASRK |
| AlgE     | HLRRPGEEVNLTTTVDDRRIATGKQ                                     |

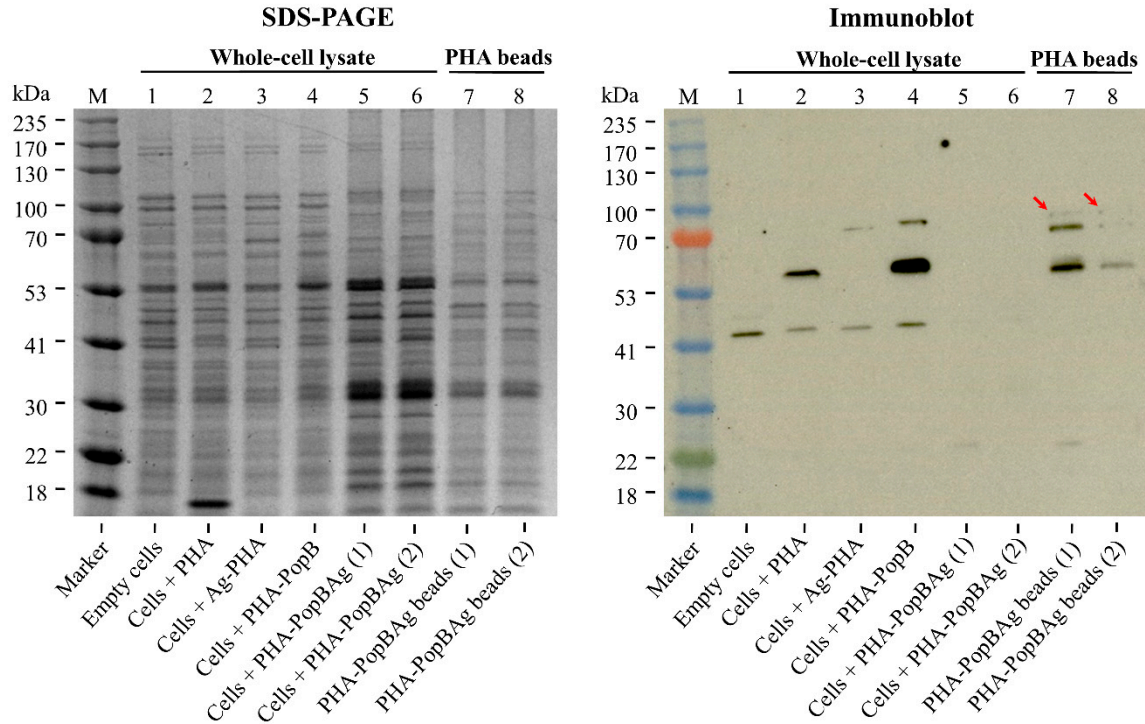

**Figure S4.** Immunoblot for detection of target fusion proteins using anti-PHA synthase antibodies. Two sets of PHA-PopBAG beads were produced to assess the PHA-PopBAG fusion protein production using SDS-PAGE and immunoblot. PHA-PopBAG fusion proteins were visible only in western blot and in the isolated PHA-PopBAG beads (red arrows) but not in the corresponding whole-cells. .

**Table S3.** Particle size and zeta-potential measurements of the PHA bead vaccines.

| PHB beads                   | Ave. Size (μm) | Std. dev. (Size) | Ave. PDI | Ave. Zeta Potential (mV) | Std. dev. (Zeta Potential) |
|-----------------------------|----------------|------------------|----------|--------------------------|----------------------------|
| PHA beads                   | 0.556          | 0.045            | 0.42     | -12.27                   | 0.351                      |
| Ag-PHA beads                | 0.323          | 0.015            | 0.28     | -13.60                   | 0.721                      |
| PHA-PopB beads              | 0.238          | 0.034            | 0.50     | -13.83                   | 0.839                      |
| Alhydrogel                  | 1.720          | 0.228            | 0.31     | 11.33                    | 1.528                      |
| PHA beads + Alhydrogel      | 3.373          | 0.139            | 0.55     | -9.14                    | 0.230                      |
| Ag-PHA beads + Alhydrogel   | 2.207          | 0.181            | 0.40     | -8.39                    | 0.396                      |
| PHA-PopB beads + Alhydrogel | 4.168          | 0.363            | 0.53     | -8.80                    | 0.425                      |

Ave. (Average); Std. dev. (Standard deviation); PDI (Polydispersity index).

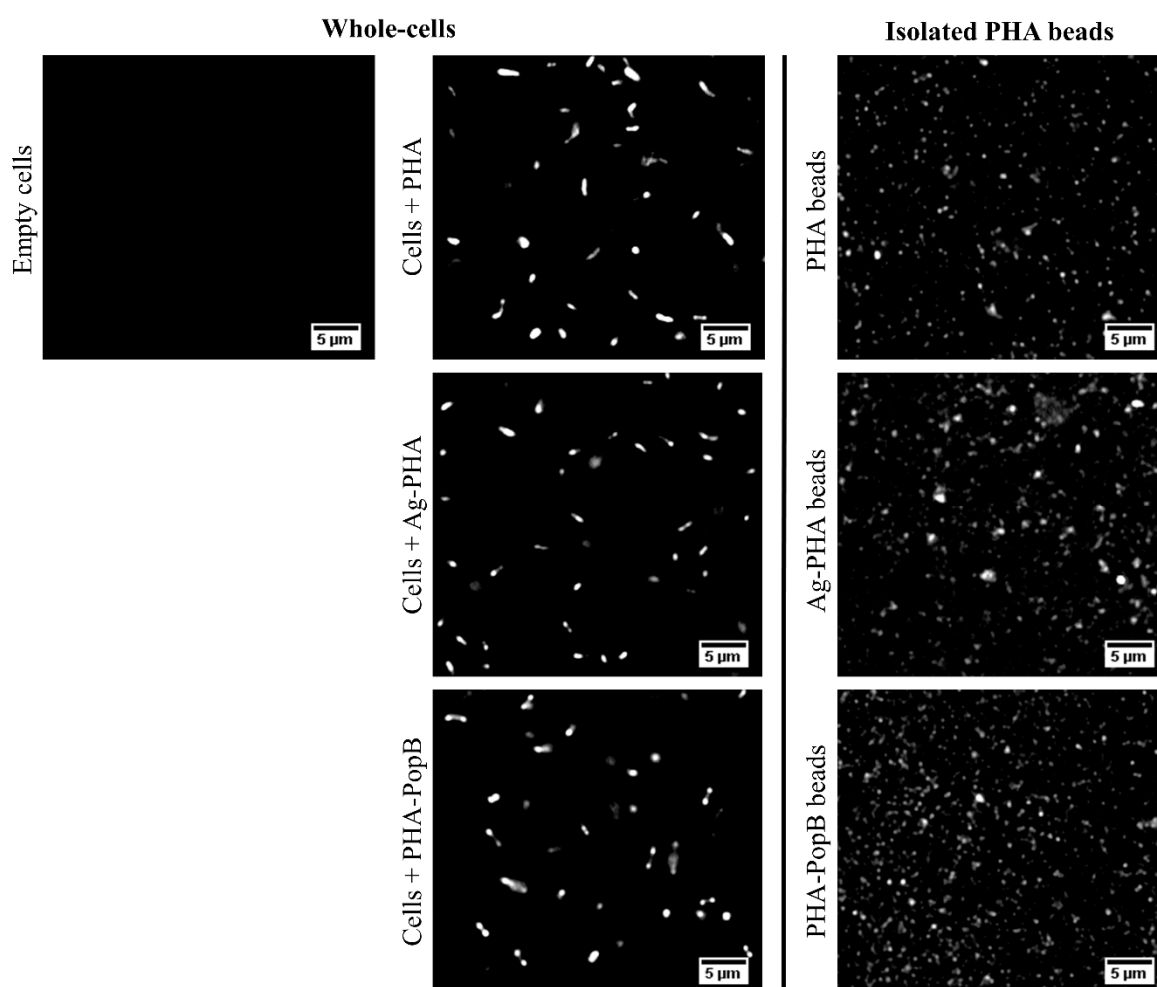

**Figure S5.** Fluorescence microscopy images of whole-cells and PHA beads produced in bioengineered *P. aeruginosa* PAO1ΔCΔ8ΔF harbouring various fusion protein-encoding pHERD20T-2 expression vectors stained with Nile-red. Fluorescence was detected in whole-cells containing respective plasmids, and the isolated PHA, Ag-PHA and PHA-PopB beads. No fluorescence was detected in the negative control empty cells (*P. aeruginosa* PAO1ΔCΔ8ΔF).

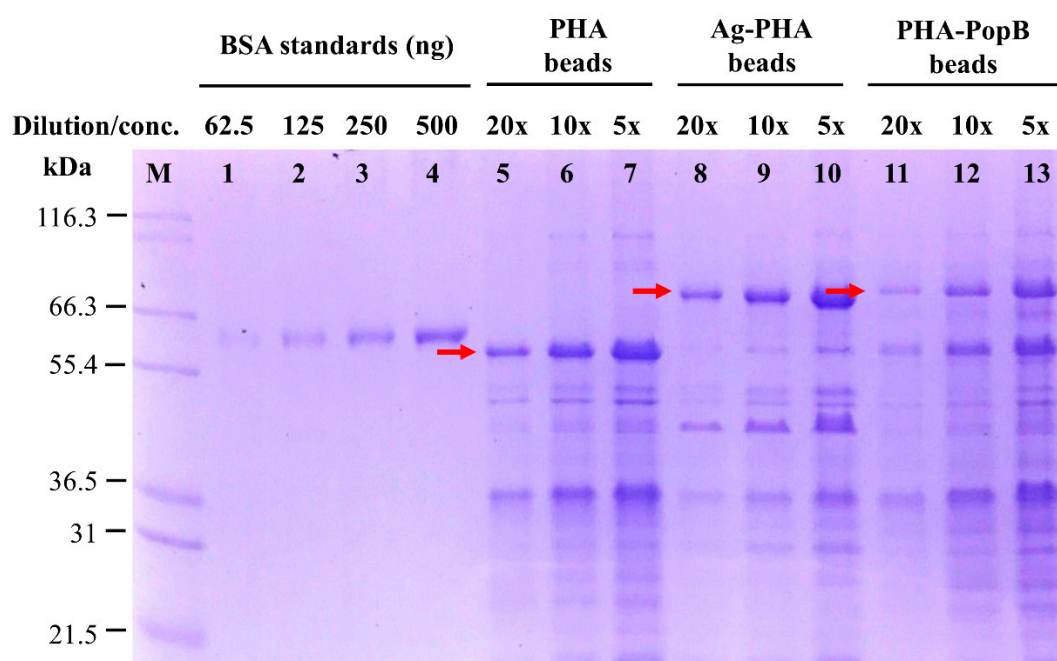



**Figure S6.** Protein quantification of the purified PHA bead vaccines by densitometry. Different amounts of BSA standard ranging between 62.5 and 500 ng were loaded on Bis-Tris gel to generate a standard curve, used to determine the antigen concentrations. The image analysed using the Image J version 1.52a (National Institute of Health). Target fusion proteins are in red arrows.

**Table S4.** Mass Spectrometry (MS) analysis for identification of PHA synthase and PHA synthase fusion proteins.

| Protein Sequence                                        |  | Protein sequence coverage and the confirmed fragments |
|---------------------------------------------------------|--|-------------------------------------------------------|
| <b>PHA (PhaC1, MW: 63.2 kDa)</b>                        |  |                                                       |
| 1 MSQKNNNELPKQAAENTLNLNPVIGIRGKDLLTSARMVLLQAVRQPLHSA    |  |                                                       |
| 51 RHVAHFSLELKNVLLGQSELPGDDRRFSDPAWSQNPLYKRYMQTYLAW     |  |                                                       |
| 101 RKELHSWISHSDLSPQDISRGQFVINLLTEAMSPNLSNPAAVKRFFET    |  |                                                       |
| 151 GGKSLLDGLGHLAKDLVNNGGMPSQVDMDAFEVGKNLATTEGAVVFRNDV  |  | 73%                                                   |
| 201 LELIQYRPITESVHERPLLVPVPPQINKFYVFDLSPDKSLARFCLRNGVQT |  | N5- R27, F79-K91, Y93-R197,                           |
| 251 FIVSWRNPTKSQREWGLTTYIEALKEAIEVLSITGSKDLNLLGACSGGI   |  | F228-R241, N246-R256, E264-                           |
| 301 TTATLVGHYVASGEKKVNAFTQLVSVLDFELNTQVALFADEKTLEAAKRR  |  | K342, S351-K461, C470-                                |
| 351 SYQSGVLEGKDMAKVFAMRPNDLIWNYWVNNYLLGNQPPAFDILYWNND   |  | K491, H514-R529, T544-R559                            |
| 401 TTRLPAALHGEFVELFKSNPLNRPGALEVSGTPIDLKQVTCDFYCVAGLN  |  |                                                       |
| 451 DHITPWESCYKSARLLGGKCEFILNSGHIQSILNPPGNPKARFMTNP     |  |                                                       |
| 501 PAEPKAWLEQAGKHADSWWLHWQQWLAERSGKTRKAPASLGNKTYPAGEA  |  |                                                       |
| 551 APGTIVHER                                           |  |                                                       |
| <b>Ag-PHA (Ag-PhaC1, MW: 77.7 kDa)</b>                  |  |                                                       |
| 1 MHLRRPGEEVNLTITVDDRRIATGKQNATAEGRAINRRVENATAEGRAI     |  |                                                       |
| 51 NRRVENATAEGRAINRRVESSHKETEARLTATEDAAARAQARADEAYRK    |  |                                                       |
| 101 ADEALGAAQKAQQTADAEANERALRMLEKASRKMSQKNNNELPKQAAENTL |  |                                                       |
| 151 NLNPVIGIRGKDLLTSARMVLLQAVRQPLHSARHVAHFSLELKNVLLGQS  |  | 62%                                                   |
| 201 ELRPGDDRRFSDPAWSQNPLYKRYMQTYLAWRKELHSWISHSDLSPQDI   |  | R4-R20, Q144-R159, F211-                              |
| 251 SRGQFVINLLTEAMSPNLSNPAAVKRFFETGGKSLLDGLGHLAKDLVN    |  | K223, Y225-R278, D297-R329,                           |
| 301 NGGMPSQVDMDAFEVGKNLATTEGAVVFRNDVLELIQYRPITESVHERPL  |  | L333-K369, N378-R388, E396-                           |
| 351 LVVPPQINKFYVFDLSPDKSLARFCLRNGVQTFIVSWRNPTKSQREWGLT  |  | K474, R482-K593, C602-K623,                           |
| 401 TYIEALKEAIEVLSITGSKDLNLLGACSGGITTATLVGHYVASGEKKVN   |  | H646-R661, T676-R691                                  |
| 451 AFTQLVSVLDFELNTQVALFADEKTLEAAKRRSYQSGVLEGKDMAKVFAM  |  |                                                       |
| 501 MRPNNDLIWNYWVNNYLLGNQPPAFDILYWNNDTTRLPAALHGEFVELFKS |  |                                                       |
| 551 NPLNRPGALEVSGTPIDLKQVTCDFYCVAGLNDHITPWESCYKSARLLGG  |  |                                                       |
| 601 KCEFILNSGHIQSILNPPGNPKARFMTNP                       |  |                                                       |
| 651 WLHWQQWLAERSGKTRKAPASLGNKTYPAGEAAPGTIVHER           |  |                                                       |
| <b>PHA-PopB (PhaC1-PopB, MW: 86.4 kDa)</b>              |  |                                                       |
| 1 MSQKNNNELPKQAAENTLNLNPVIGIRGKDLLTSARMVLLQAVRQPLHSA    |  |                                                       |
| 51 RHVAHFSLELKNVLLGQSELPGDDRRFSDPAWSQNPLYKRYMQTYLAW     |  |                                                       |
| 101 RKELHSWISHSDLSPQDISRGQFVINLLTEAMSPNLSNPAAVKRFFET    |  |                                                       |
| 151 GGKSLLDGLGHLAKDLVNNGGMPSQVDMDAFEVGKNLATTEGAVVFRNDV  |  | 61%                                                   |
| 201 LELIQYRPITESVHERPLLVPVPPQINKFYVFDLSPDKSLARFCLRNGVQT |  | Q12-R27, F79-K91, Y93-R146,                           |
| 251 FIVSWRNPTKSQREWGLTTYIEALKEAIEVLSITGSKDLNLLGACSGGI   |  | D165-K237, N246-R256, E264-                           |
| 301 TTATLVGHYVASGEKKVNAFTQLVSVLDFELNTQVALFADEKTLEAAKRR  |  | K342, V365-K461, C470-K491,                           |
| 351 SYQSGVLEGKDMAKVFAMRPNDLIWNYWVNNYLLGNQPPAFDILYWNND   |  | H514-R529, T544-R559, A658-                           |
| 401 TTRLPAALHGEFVELFKSNPLNRPGALEVSGTPIDLKQVTCDFYCVAGLN  |  | K668, F676-K716, A729-R740,                           |
| 451 DHITPWESCYKSARLLGGKCEFILNSGHIQSILNPPGNPKARFMTNP     |  | M748-R758                                             |
| 501 PAEPKAWLEQAGKHADSWWLHWQQWLAERSGKTRKAPASLGNKTYPAGEA  |  |                                                       |
| 551 APGTIVHERFGWISAIASIIVGAIMVATGVGAAAGALMIAGGVMGVVSQ   |  |                                                       |
| 601 SVQQAADGLISKEVMEKLGPAALMGIEMAVALLAAVVSFGGSAGVGLARL  |  |                                                       |
| 651 GAKIGGKAAEMTASLASKVADLGKFGSLAGQSLSHSLKLGVSQVSDLTLD  |  |                                                       |

701 VANGAAQATHSGFQAKAANRQADVQESRADLTTLQGVIERLKEELSRMLE  
751 AFQEIMERIFAMLQAKGETLHNLSSRPAAI

\*Confirmed sequences are in red colour. MW (Molecular weight). Yellow highlights are the respective Ag and PopB sequences.

**Table S5.** Identification of the nine PHA bead associated HCPs by mass spectrometry.

| Band <sup>a</sup> | Rank <sup>b</sup> | Database hits                                                                                                                                                                                          |
|-------------------|-------------------|--------------------------------------------------------------------------------------------------------------------------------------------------------------------------------------------------------|
| I                 | 1                 | RecName: Full=Outer membrane porin F; Flags: Precursor                                                                                                                                                 |
|                   | 2                 | RecName: Full=Outer membrane protein assembly factor BamD; Flags: Precursor                                                                                                                            |
|                   | 3                 | 2-alkenal reductase [Pseudomonas aeruginosa]                                                                                                                                                           |
|                   | 4                 | hypothetical protein [Pseudomonas aeruginosa]                                                                                                                                                          |
|                   | 5                 | efflux RND transporter periplasmic adaptor subunit [Pseudomonas aeruginosa]                                                                                                                            |
|                   | 6                 | RecName: Full=UDP-N-acetylglucosamine--N-acetylmuramyl-(pentapeptide) pyrophosphoryl-undecaprenol N-acetylglucosamine transferase; AltName: Full=Undecaprenyl-PP-MurNAc-pentapeptide-UDPGlcNAc GlcN... |
| II                | 1                 | alpha/beta hydrolase [Pseudomonas aeruginosa]                                                                                                                                                          |
|                   | 2                 | MULTISPECIES: type VI secretion-associated lipoprotein TagQ [Pseudomonas]                                                                                                                              |
|                   | 3                 | RecName: Full=ATP synthase gamma chain; AltName: Full=ATP synthase F1 sector gamma subunit; AltName: Full=F-ATPase gamma subunit                                                                       |
|                   | 4                 | ABC transporter permease, partial [Pseudomonas aeruginosa]                                                                                                                                             |
|                   | 5                 | universal stress protein, partial [Pseudomonas aeruginosa]                                                                                                                                             |
|                   | 6                 | acyl dehydratase [Pseudomonas aeruginosa]                                                                                                                                                              |
|                   | 7                 | hypothetical protein [Pseudomonas aeruginosa]                                                                                                                                                          |
| III               | 1                 | peptidylprolyl isomerase [Pseudomonas aeruginosa]                                                                                                                                                      |
|                   | 2                 | RecName: Full=30S ribosomal protein S2                                                                                                                                                                 |
|                   | 3                 | ParA family protein [Pseudomonas aeruginosa]                                                                                                                                                           |
|                   | 4                 | RecName: Full=50S ribosomal protein L1                                                                                                                                                                 |
| IV                | 1                 | RecName: Full=Peptidoglycan-associated lipoprotein; Flags: Precursor                                                                                                                                   |
|                   | 2                 | nuclear transport factor 2 family protein [Pseudomonas aeruginosa]                                                                                                                                     |
|                   | 3                 | RecName: Full=Phosphopantetheine adenyltransferase; AltName: Full=Dephospho-CoA pyrophosphorylase; AltName: Full=Pantetheine-phosphate adenyltransferase; Short=PPAT                                   |
|                   | 4                 | 3-hydroxyacyl-[acyl-carrier-protein] dehydratase FabZ [Pseudomonas aeruginosa]                                                                                                                         |
| V                 | 1                 | class II poly(R)-hydroxyalkanoic acid synthase [Pseudomonas aeruginosa]                                                                                                                                |
|                   | 2                 | molecular chaperone GroEL [Pseudomonas aeruginosa]                                                                                                                                                     |
|                   | 3                 | MULTISPECIES: ShlB/FhaC/HecB family hemolysin secretion/activation protein [Pseudomonas]                                                                                                               |
|                   | 4                 | MULTISPECIES: hypothetical protein [Pseudomonas]                                                                                                                                                       |
|                   | 5                 | methyl-accepting chemotaxis protein [Pseudomonas aeruginosa]                                                                                                                                           |
|                   | 6                 | methyl-accepting chemotaxis protein [Pseudomonas aeruginosa]                                                                                                                                           |
|                   | 7                 | RecName: Full=Glutamine synthetase; Short=GS; AltName: Full=Glutamate--ammonia ligase; AltName: Full=Glutamine synthetase I beta; Short=GSI beta                                                       |
|                   | 8                 | MULTISPECIES: ATP-dependent RNA helicase RhlB [Pseudomonas]                                                                                                                                            |
| VI                | 1                 | RecName: Full=Peptidoglycan-associated lipoprotein; Flags: Precursor                                                                                                                                   |
|                   | 2                 | RecName: Full=30S ribosomal protein S7                                                                                                                                                                 |
|                   | 3                 | 3-hydroxyacyl-[acyl-carrier-protein] dehydratase FabZ [Pseudomonas aeruginosa]                                                                                                                         |
| VII               | 1                 | class II poly(R)-hydroxyalkanoic acid synthase [Pseudomonas aeruginosa]                                                                                                                                |
|                   | 2                 | hypothetical protein PA2540 [Pseudomonas aeruginosa PAO1]                                                                                                                                              |
|                   | 3                 | hypothetical protein [Pseudomonas aeruginosa]                                                                                                                                                          |
| VIII              | 4                 | ShlB/FhaC/HecB family hemolysin secretion/activation protein [Pseudomonas aeruginosa]                                                                                                                  |
|                   | 1                 | RecName: Full=Outer membrane porin F; Flags: Precursor                                                                                                                                                 |
|                   | 2                 | RecName: Full=Outer membrane protein assembly factor BamD; Flags: Precursor                                                                                                                            |
|                   | 3                 | MULTISPECIES: glycoside hydrolase family 43 [Pseudomonas]                                                                                                                                              |
|                   | 4                 | AraC family transcriptional regulator [Pseudomonas aeruginosa]                                                                                                                                         |
|                   | 5                 | serine/threonine protein kinase [Pseudomonas aeruginosa]                                                                                                                                               |
|                   | 6                 | alpha/beta hydrolase [Pseudomonas aeruginosa]                                                                                                                                                          |
| IX                | 7                 | RecName: Full=Dihydroorotate dehydrogenase (quinone); AltName: Full=DHODehase; Short=DHOD; Short=DHODase; AltName: Full=Dihydroorotate oxidase                                                         |
|                   | 1                 | rhamnosyltransferase [Pseudomonas aeruginosa PAO1]                                                                                                                                                     |
|                   | 2                 | cell division protein ZipA [Pseudomonas aeruginosa]                                                                                                                                                    |



|   |                                                                         |
|---|-------------------------------------------------------------------------|
| 3 | imelysin [ <i>Pseudomonas aeruginosa</i> ]                              |
| 4 | RNA-directed DNA polymerase [ <i>Pseudomonas aeruginosa</i> ]           |
| 5 | alpha/beta hydrolase [ <i>Pseudomonas aeruginosa</i> ]                  |
| 6 | AraC family transcriptional regulator [ <i>Pseudomonas aeruginosa</i> ] |
| 7 | biofilm formation protein PslC [ <i>Pseudomonas aeruginosa</i> PAO1]    |

<sup>a</sup> Protein bands identified on SDS-PAGE. <sup>b</sup> Peptide filter (PeptideProphet  $\geq 0.995$ ), protein filter (UniquePeptides  $\geq 6$ ) and filtered by approximate molecular weight. The rank is based on the number of 'unique peptides'; the higher the number of 'unique peptides', the higher is the ranking.

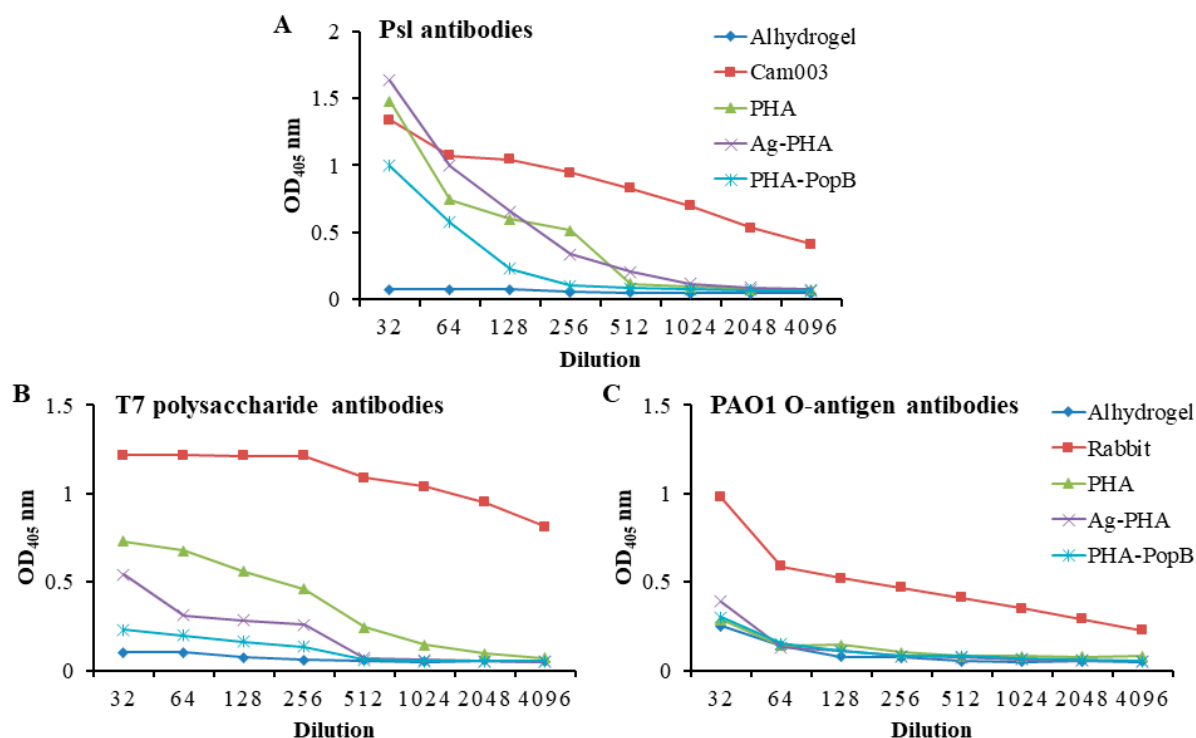

**Figure S7.** Anti-Psl and anti-LPS O-antigen polysaccharide responses in mice vaccinated with various PHA beads. ELISA plates were coated with the various polysaccharides and binding of antibodies in pooled sera was assessed. **(A)** Anti-Psl antibodies. Human anti-Psl mAb (Cam-003) is the positive control. **(B)** Anti-T7 LPS antibodies. Rabbit antisera to live-attenuated *P. aeruginosa* PAO1 $\Delta$ aroA is the positive control. **(C)** Anti-PAO1 O-antigen polysaccharide antibodies. Rabbit antisera to live-attenuated *P. aeruginosa* PAO1 $\Delta$ aroA is the positive control.

## References

- [1] Koh AY, Priebe GP, Ray C, Van Rooijen N, Pier GB. Inescapable need for neutrophils as mediators of cellular innate immunity to acute *Pseudomonas aeruginosa* pneumonia. *Infection and immunity*. 2009;77:5300-10.
- [2] Lee JW, Parlane NA, Wedlock DN, Rehm BHA. Bioengineering a bacterial pathogen to assemble its own particulate vaccine capable of inducing cellular immunity. *Sci Rep*. 2017;7:41607.
- [3] Qiu D, Damron FH, Mima T, Schweizer HP, Hongwei DY. PBAD-based shuttle vectors for functional analysis of toxic and highly regulated genes in *Pseudomonas* and *Burkholderia* spp. and other bacteria. *Applied and environmental microbiology*. 2008;74:7422-6.
